# Supplementary material for: Self-supported mesoscopic tin oxide nanofilms for electrocatalytic reduction of carbon dioxide to formate
Source: Royal Society of Chemistry journal article supplement (doi:10.1039/d1cc00927c), 2021-01-01
Supplement: d1cc00927c1.pdf [file d1cc00927c1.pdf]

## Electronic supplementary information

### **Self-supported mesoscopic tin oxide nanofilms for electrocatalytic reduction of carbon dioxide to formate**

Juwon Jeong,<sup>‡ab</sup> Jin Soo Kang,<sup>‡abc</sup>, Heejong Shin,<sup>ab</sup> Soo Hong Lee,<sup>ab</sup> Junghwan Jang,<sup>ab</sup>

Taeghwan Hyeon,<sup>ab</sup> Hyun S. Park<sup>\*d</sup> and Yung-Eun Sung<sup>\*ab</sup>

<sup>a</sup>Center for Nanoparticle Research, Institute for Basic Science (IBS), Seoul 08826, Republic of Korea.

<sup>b</sup>School of Chemical and Biological Engineering, Seoul National University, Seoul 08826, Republic of Korea.

<sup>c</sup>Department of Chemical Engineering, Massachusetts Institute of Technology, Cambridge, MA 02139, USA.

<sup>d</sup>Center for Hydrogen Fuel Cell Research, Korea Institute of Science and Technology (KIST), Seoul 02792, Republic of Korea

<sup>‡</sup>These authors contributed equally to this work.

<sup>\*</sup>Corresponding authors. E-mail: hspark@kist.re.kr (H. S. Park), ysung@snu.ac.kr (Y.-E. Sung)

## Experimental

### Preparation and characterization of nanostructured SnO<sub>2</sub> electrodes

Anodization of Sn foil (Alfa Aesar, 0.25 mm-thick, 99.8%) was carried out in 0.5 M oxalic acid in a two-electrode system (with the assistance of ultrasonication), where a Pt wire was used as counter electrode. The distance between the two electrodes was 5 cm, and 10 V was applied for 10 min. As-anodized electrode was washed with distilled water and was dried in an oven, followed by thermal annealing in air at 500 °C for 3 h. The morphology of SnO<sub>2</sub> electrodes were examined by SEM using Carl Zeiss MERLIN Compact, and XRD patterns were collected by using Rigaku D-MAX2500-PC. XPS analyses were carried out using a synchrotron radiation source at 10A2 beamline of Pohang Accelerator Laboratory (PAL) or by using Thermo Sigma Probe equipped with an Al-K $\alpha$  source. XAFS measurements were performed at 10C beamline of PAL, and the data were processed by using Demeter software package. A potentiostat (Autolab PGSTAT302N) was used for the estimation of EDLCs.

### Electrochemical reduction of CO<sub>2</sub>

For CO<sub>2</sub>RR, all electrochemical measurements were carried out in a three-electrode configuration using a homemade gas-tight H-type cell and Autolab PGSTAT302N, with a Ag/AgCl reference electrode (filled with saturated KCl solution) and a graphite rod counter electrode. The glass cell was comprised of anodic and cathodic compartments which were separated by cation exchange membrane (Nafion®117) to prevent any contamination by crossovers between cathode and anode. Ohmic resistance of solution was measured using electrochemical impedance spectroscopy (EIS) before the reaction and was used for iR correction for all of the measurements. CO<sub>2</sub>-saturated 0.5 M KHCO<sub>3</sub> was used as electrolyte; CO<sub>2</sub> gas was delivered with specific rate (20 sccm) from at least 30 minutes before the reaction and was continuously purged throughout the measurements. In the case of steady-state CO<sub>2</sub>RR, cathodic electrolyte was continuously stirred at 400 rpm. All potentials were converted to RHE scale by using the following equation:

$$E_{\text{RHE}} = E_{\text{Ag/AgCl}} + 0.197 \text{ V} + 0.0592 \text{ pH} \quad (1)$$

### Analyses of products from CO<sub>2</sub>RR

Gaseous products were analyzed by using a GC (Agilent 7890B) equipped with a flame ionization detector (FID) and a thermal conductivity detector (TCD) for detection of CO and H<sub>2</sub>, respectively. FE of each gaseous product was calculated from the obtained volume concentration using the following equation:

$$FE_j = \frac{i_j}{i_{total}} \times 100\% = \frac{2 \times F \times \frac{p_0 Q v_j}{RT}}{i_{total}} \times 100\% \quad (j = H_2 \text{ or } CO) \quad (2)$$

(where  $v_j$  = volume concentration measured from GC,  $Q$  = flow rate of delivering CO<sub>2</sub>,  $F$  = 96485 C mol<sup>-1</sup>,  $p_0$  = 101325 Pa,  $R$  = 8.314 J mol<sup>-1</sup> K<sup>-1</sup>,  $T$  = 298.15 K, and  $i_{total}$  = overall current measured at the moment of injection). The detailed derivation processes of the equation (2) is presented in the Supporting Information. Quantification of formate was performed by measuring 600 MHz NMR peak area using Bruker AVANCE 600. The sample for <sup>1</sup>H NMR was prepared by mixing 450 μL aliquot of electrolyte with 50 μL of 1% 3-(trimethylsilyl)-1-propanesulfonic acid (DSS) in D<sub>2</sub>O (Sigma-Aldrich). The formate peak area on <sup>1</sup>H NMR ( $\delta$  = 8.445) was converted to the amount of formate based on the calibration curve in Fig. S8. Then, formate selectivity was calculated by dividing this amount by the total charge consumed during the CO<sub>2</sub>RR. All of the experiments related to product quantification were conducted at least three times to verify the reliability of our results by presenting the statistics.

### Calculation of Faradaic efficiencies of gaseous products

In general, Faradaic efficiency (FE) is calculated by dividing the charges used for producing a specific product by the overall charges that flowed. For the CO<sub>2</sub>RR in this study, GC signal collected at the moment of injection was used for the evaluation of FE, which can be summarized as the following equation:

$$FE_j = \frac{i_j}{i_{total}} \times 100\% \quad (j = \text{each product}) \quad (1)$$

$i_{total}$  can be obtained from the experimental data, and  $i_j$  could be calculated from the equations written below. From the definition of current,  $i_j$  can be expressed as follows:

$$i_j = \frac{dC_j}{dt} \quad (2)$$

Then, using the product-charge relationship and ideal gas equation ( $pV = nRT$ ), the charge  $C_j$  could be written as Eqn. 5.

$$C_j = mFn_j = mF \frac{p_0 V_j}{RT} \quad (3)$$

Since the flow rate is a fixed value,  $V_j$  can be expressed by using the signal obtained from GC, as follows:

$$\frac{dV_j}{dt} = v_j Q \quad (4)$$

By combining the three equations (Eqns. 4-6) and substituting  $m$  with 2 for the cases of H<sub>2</sub> and CO productions,  $i_j$  can be rearranged as Eqn. 7.

$$i_j = 2 \times F \times \frac{p_0 v_j Q}{RT} \quad (5)$$
(7)

Finally, equation for FE can be derived by Eqns. 3 and 7. The following equation is also shown as Eqn. 2 above.

$$FE_j = \frac{2 \times F \times \frac{p_0 Q v_j}{RT}}{i_{total}} \times 100\%$$
(8)

### Abbreviations

$C_j$  = total charge used to produce the product j [=] C

$m$  = the number of electrons used to produce a molecule j

$n_j$  = the total mole number of product j [=] mol

$V_j$  = the total volume of product j [=] m<sup>3</sup>

$v_j$  = the volume percentage of product j measured from GC signal

$Q$  = total flow rate [=] m<sup>3</sup> s<sup>-1</sup>

( $j$  = H<sub>2</sub> or CO)

**Table S1.** Summary of fitted results from XPS O 1s spectra displayed in Fig. 2b.

| <b>Electrodes</b>   |                | <b>Lattice<br/>Oxygen</b> | <b>Non-Stoichiometric<br/>Oxygen</b> | <b>Adsorbed<br/>Species</b> |
|---------------------|----------------|---------------------------|--------------------------------------|-----------------------------|
| Sn foil             | Peak Positions | 530.34 eV                 | 532.01 eV                            | 533.39 eV                   |
|                     | Areal Ratio    | 40.47 %                   | 48.64%                               | 10.89%                      |
| AN-SnO <sub>x</sub> | Peak Positions | 530.47 eV                 | 531.79 eV                            | -                           |
|                     | Areal Ratio    | 50.77%                    | 49.23%                               | -                           |
| TA-SnO <sub>2</sub> | Peak Positions | 530.75 eV                 | 531.78 eV                            | -                           |
|                     | Areal Ratio    | 54.77%                    | 45.23%                               | -                           |

**Table S2.** Comparisons on electrochemical CO<sub>2</sub>RR performances of TA-SnO<sub>2</sub> and previously reported formate-producing Sn-based catalysts.

| Electrode Materials                                     | Electrolyte              | Potential<br>(V vs. RHE) | FE <sub>formate</sub><br>(%) | <i>j</i> <sub>HCOO<sup>-</sup></sub><br>(mA/cm <sup>2</sup> ) | Reference<br>s<br>(year) |
|---------------------------------------------------------|--------------------------|--------------------------|------------------------------|---------------------------------------------------------------|--------------------------|
| TA-SnO <sub>2</sub>                                     | 0.5 M KHCO <sub>3</sub>  | −0.80                    | 60.11                        | 33.66                                                         | This work                |
| Surface-engineered Sn foil                              | 0.1 M KHCO <sub>3</sub>  | −1.09                    | 77.4                         | 3.7                                                           | S1<br>(2017)             |
| Sn dendrite/Sn foil                                     | 0.1 M KHCO <sub>3</sub>  | −1.36                    | 71.6                         | ~23                                                           | S2<br>(2015)             |
| Sn-Cu alloy                                             | 0.1 M KHCO <sub>3</sub>  | −0.50                    | 95                           | 31.4                                                          | S3<br>(2019)             |
| Ag-Sn core-shell alloy                                  | 0.5 M NaHCO <sub>3</sub> | −0.90                    | 87.2                         | ~25                                                           | S4<br>(2017)             |
| Sn quantum sheet/graphene                               | 0.1 M NaHCO <sub>3</sub> | −1.13                    | 89                           | 18.7                                                          | S5<br>(2016)             |
| Sn/SnO <sub>x</sub> thin film                           | 0.5 M NaHCO <sub>3</sub> | −0.7                     | ~40                          | ~1.6                                                          | S6<br>(2012)             |
| SnS <sub>2</sub> -derived Sn/<br>reduced graphene oxide | 0.1 M KHCO <sub>3</sub>  | −1.05                    | 90                           | 10.0                                                          | S7<br>(2017)             |
| SnO <sub>2</sub> nanoparticles/<br>carbon cloth         | 0.5 M NaHCO <sub>3</sub> | −1.07                    | 85                           | 45                                                            | S8<br>(2017)             |
| Sn(S)/Au needle                                         | 0.1 M KHCO <sub>3</sub>  | −0.75                    | 95                           | 51.2                                                          | S9<br>(2017)             |

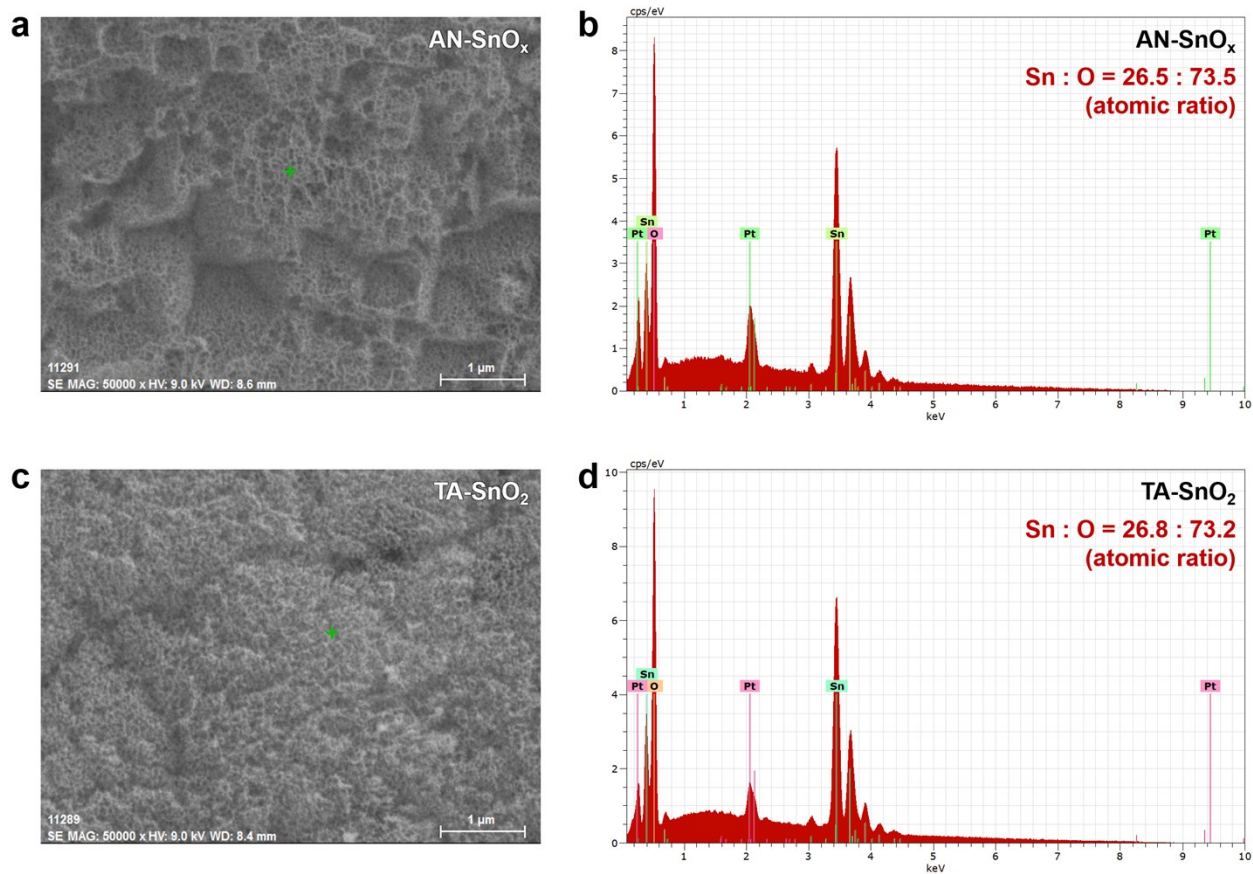

**Fig. S1.** (a) SEM image of AN-SnO<sub>x</sub> and (b) corresponding EDS spectrum. (c) SEM image of TA-SnO<sub>2</sub> and (d) corresponding EDS spectrum. For assigning the EDS signals, Pt was included in addition to Sn and O due to the presence of thin layer of Pt deposited on the surface to improve the conductivity during the SEM analysis.

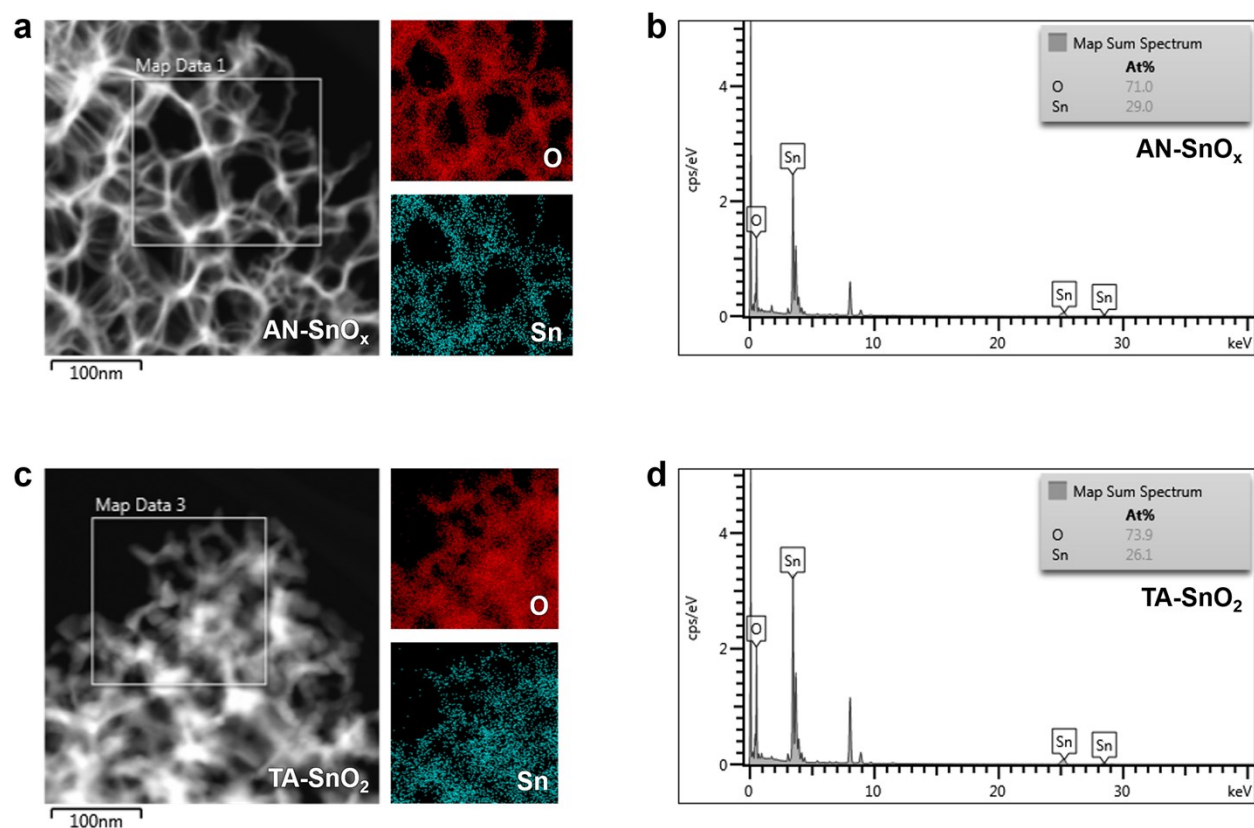

**Fig. S2.** (a,c) Scanning transmission electron microscopy (STEM) image of (a) AN-SnO<sub>x</sub> and (c) TA-SnO<sub>2</sub> and corresponding elemental maps of O and Sn. (b,d) EDS spectra (b) AN-SnO<sub>x</sub> and (d) TA-SnO<sub>2</sub> obtained from the regions marked in (a) and (c), respectively.

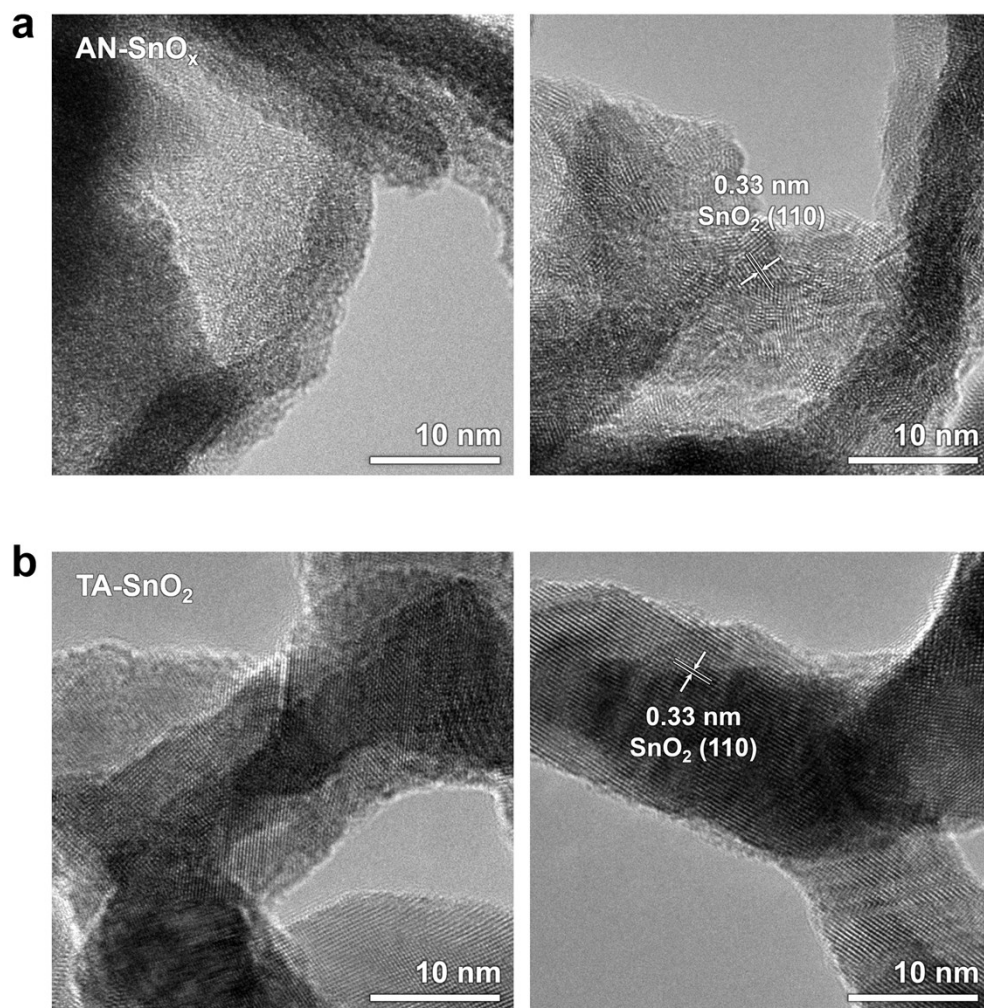

**Fig. S3.** High-magnification TEM images of (a) AN-SnO<sub>x</sub> and (b) TA-SnO<sub>2</sub>.

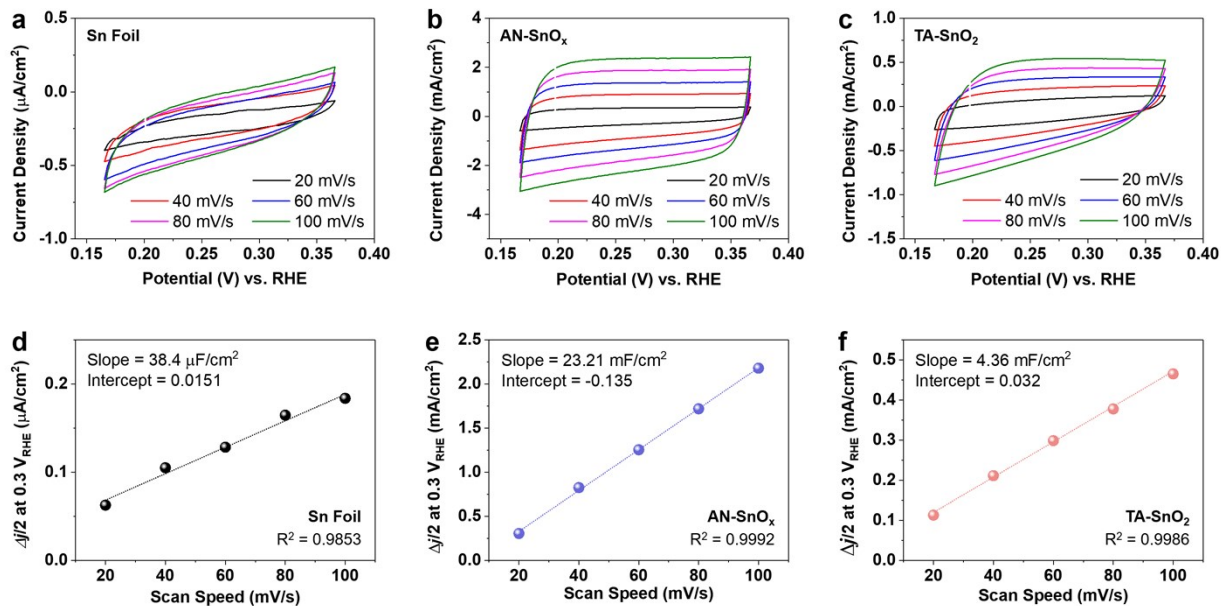

**Fig. S4.** (a-c) CV diagrams of (a) Sn foil, (b) AN-SnO<sub>x</sub>, and (c) TA-SnO<sub>2</sub> measured in Ar-saturated 0.5 M KHCO<sub>3</sub> electrolyte at various scan rates. The potential window of 0.17 to 0.37 V was selected to minimize possible interference from Sn-oxidation and SnO<sub>x</sub>-reduction currents. (d-f) Capacitive currents respectively obtained from (a-c) at 0.3 V and their linear fits for calculations of EDLCs of (d) Sn foil, (e) AN-SnO<sub>x</sub>, and (f) TA-SnO<sub>2</sub>.

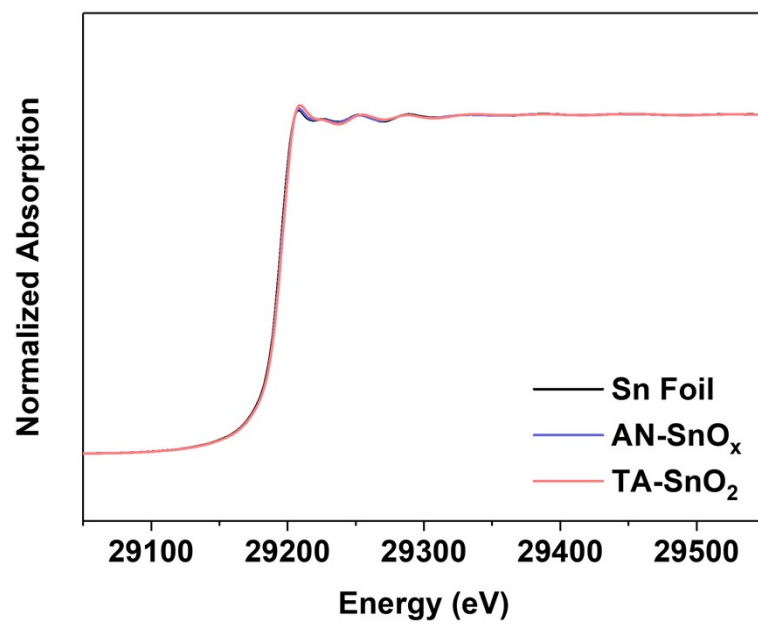

**Fig. S5.** XAFS spectra of Sn foil, AN-SnO<sub>x</sub>, and TA-SnO<sub>2</sub>.

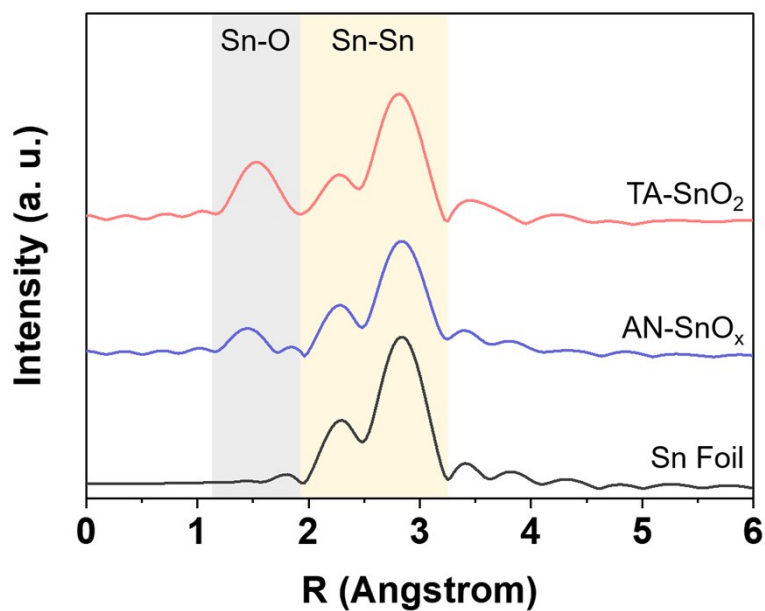

**Fig. S6.**  $k^3$ -weighted Fourier transform of EXAFS spectra of Sn foil, AN-SnO<sub>x</sub>, and TA-SnO<sub>2</sub> obtained at Sn K-edge.

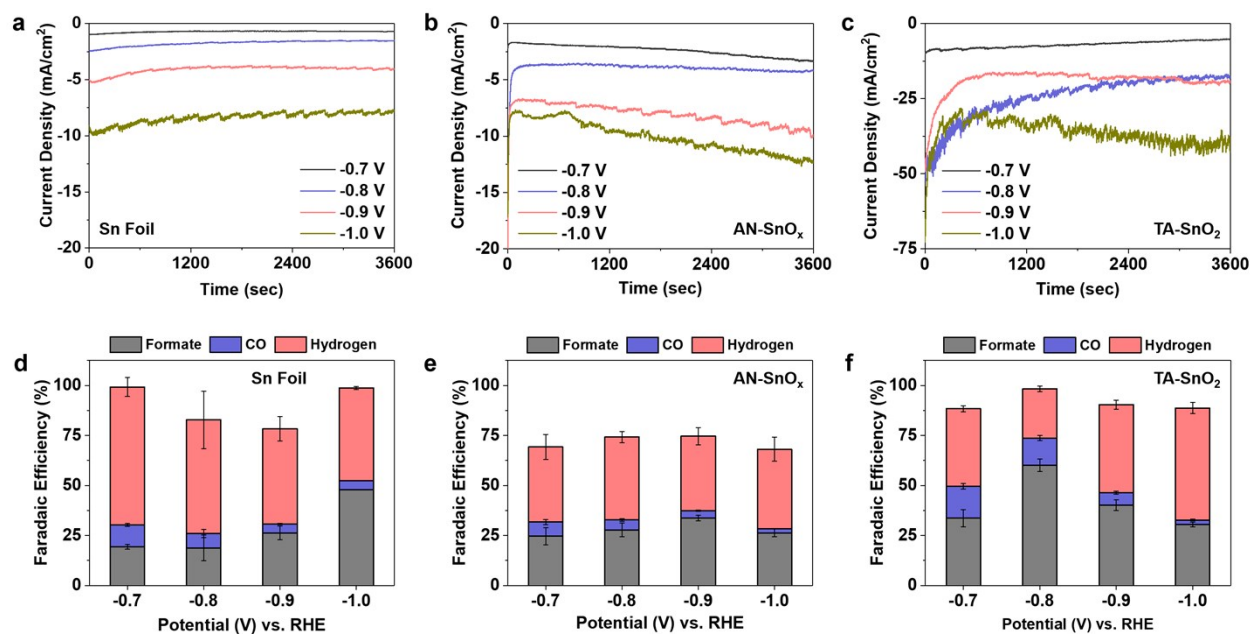

**Fig. S7.** (a-c) Steady-state CO<sub>2</sub>RR measurements of (a) Sn foil, (b) AN-SnO<sub>x</sub>, and (c) TA-SnO<sub>2</sub> under various applied potentials. (d-f) Faradaic efficiencies of products for (d) Sn foil, (e) AN-SnO<sub>x</sub>, and (f) TA-SnO<sub>2</sub> obtained after the CO<sub>2</sub>RR depicted in (a-c), respectively.

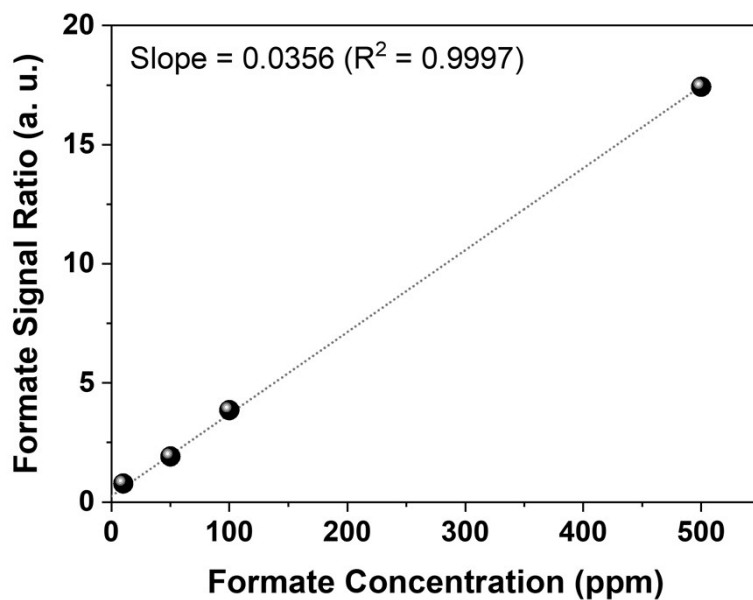

**Fig. S8.** The calibration curve for the evaluation of formate concentration. The peak area of formate ( $\delta = 8.445$ ) was first modified with respect to reference DSS peak ( $\delta = 0$ ), and the obtained value was calibrated again using the curve above.

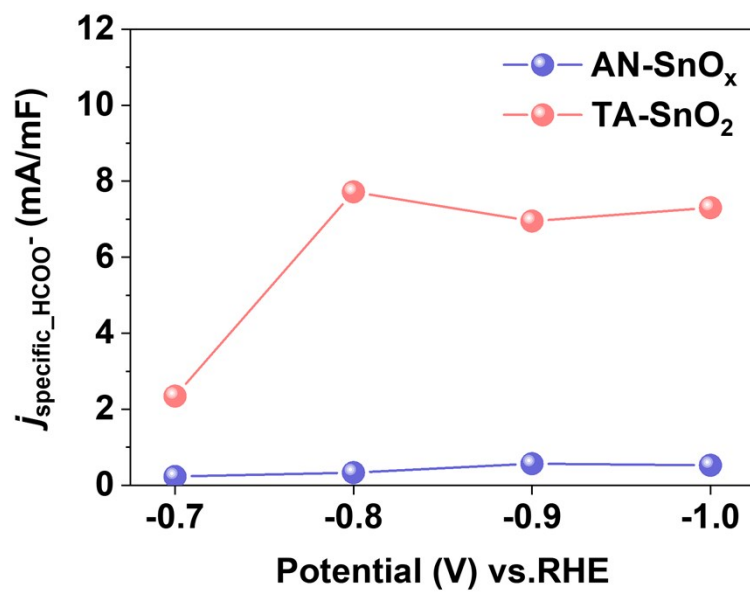

**Fig. S9.** Comparison between the specific CO<sub>2</sub>RR activities of AN-SnO<sub>x</sub> and TA-SnO<sub>2</sub> toward formate production by  $j_{\text{HCOO}^-}$  divided by EDLCs.

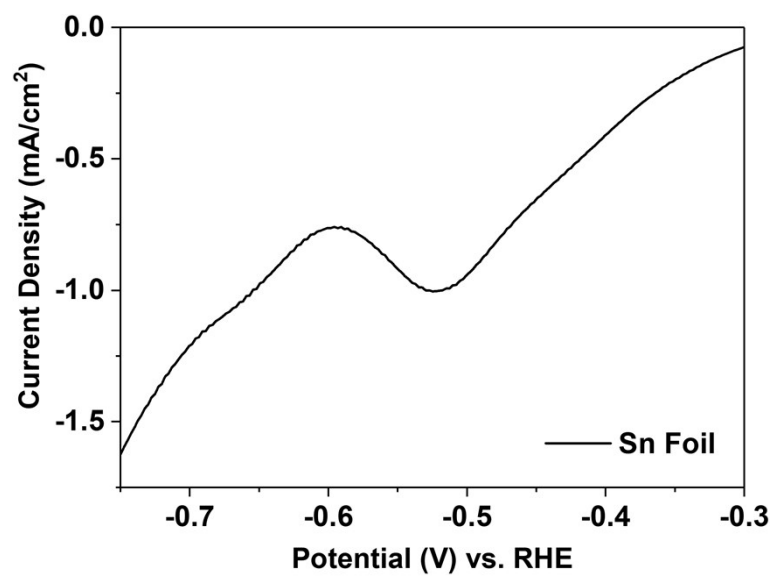

**Fig. S10.** Magnified version of the CO<sub>2</sub>RR curve of bare Sn foil.

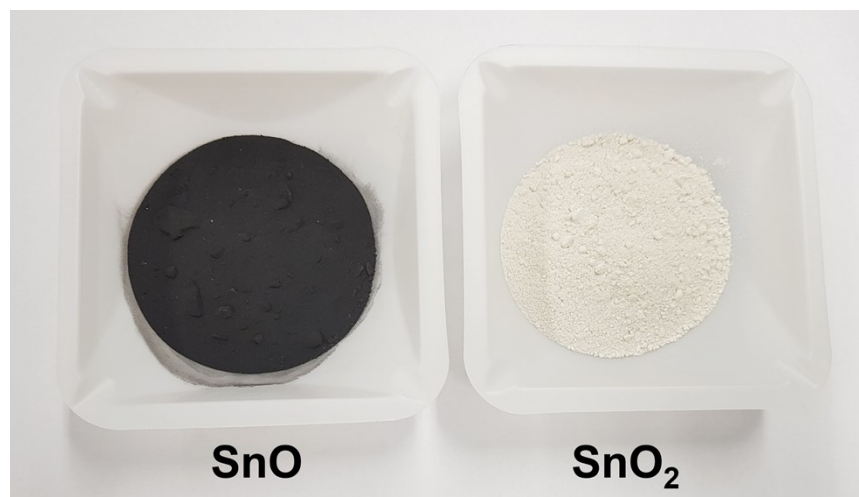

**Fig. S11.** Digital photograph images of commercial SnO and SnO<sub>2</sub> (from Sigma-Aldrich).

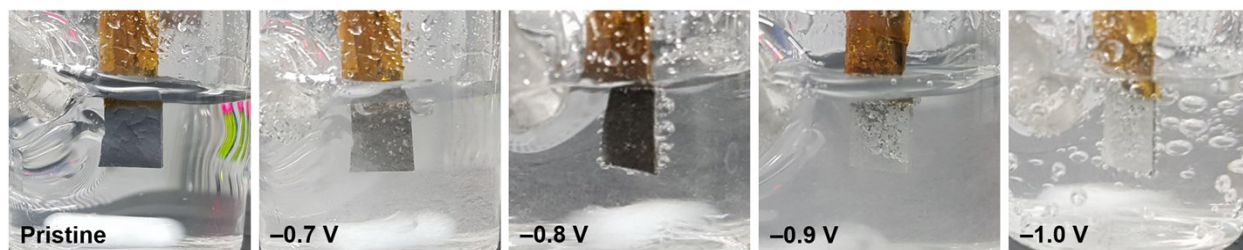

**Fig. S12.** Digital photograph images of TA-SnO<sub>2</sub> during CO<sub>2</sub>RR under various applied potentials.

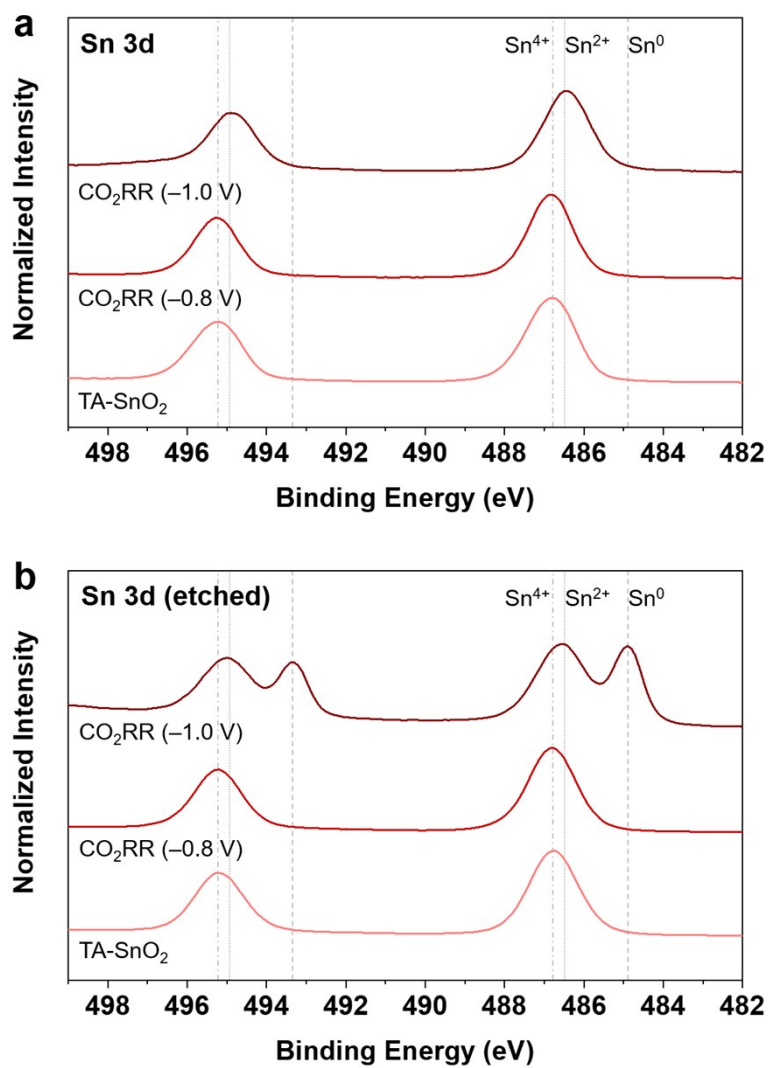

**Fig. S13.** (a) Bare and (b) surface-etched (1 min Ar-sputtered) XPS Sn 3d spectra before and after CO<sub>2</sub>RR.

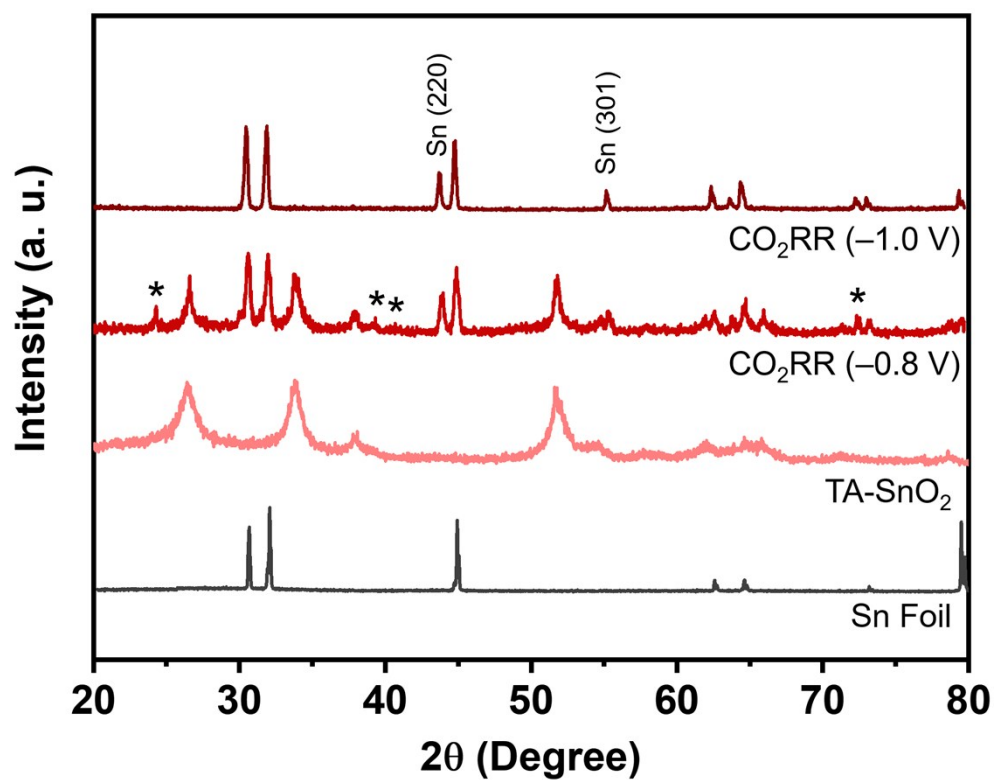

**Fig. S14.** XRD patterns of TA-SnO<sub>2</sub> before and after CO<sub>2</sub>RR at -0.8 V and -1.0 V. The peaks assigned with asterisks are signals from gray Sn (JCPDS #05-0390).

## References

- S1 R. Daiyan, X. Lu, Y.G. Ng and R. Amal, *Catal. Sci. Technol.*, 2017, **7**, 2542-2550.
- S2 D. H. Won, C. H. Choi, J. Chung, M. W. Chung, E. H. Kim and S. I. Woo, *ChemSusChem*, 2015, **8**, 3092-3098.
- S3 X. Zheng, Y. Ji, J. Tang, J. Wang, B. Liu, H.-G. Steinrück, K. Lim, Y. Li, M. F. Toney, K. Chan and Y. Cui, *Nat. Catal.*, 2019, **2**, 55-61.
- S4 W. Luc, C. Collins, S. Wang, H. Xin, K. He, Y. Kang and F. Jiao, *J. Am. Chem. Soc.*, 2017, **139**, 1885-1893.
- S5 F. Lei, W. Liu, Y. Sun, J. Xu, K. Liu, L. Liang, T. Yao, B. Pan, S. Wei and Y. Xie, *Nat. Commun.*, 2016, **7**, 12697.
- S6 Y. Chen and M. K. Kanan, *J. Am. Chem. Soc.*, 2012, **134**, 1986-1989.
- S7 F. Li, L. Chen, M. Xue, T. Williams, Y. Zhang, D. Macfarlane and J. Zhang, *Nano Energy*, 2017, **31**, 270-277.
- S8 F. Li, L. Chen, G. P. Knowles, D. R. MacFarlane and L. Zhang, *Angew. Chem. Int. Ed.*, 2017, **56**, 505-509.
- S9 X. Zheng, P. D. Luna, F. P. D. Arquer, B. Zhang, N. Becknell, M. B. Ross, Y. Li, M. N. Banis, Y. Li, M. Liu, O. Voznyy, C.T. Dinh, T. Zhuang, P. Stadler, Y. Cui, X. Du, P. Yang and E. H. Sargent, *Joule*, 2017, **1**, 794-805.
